# Supplementary material
Source: PubMed Central journal article supplement (PMC7936358)
Supplement: pnas.2013676118.sapp.pdf [file pnas.2013676118.sapp.pdf]

## SI Appendix

**SI Appendix includes:**

**Details about numerical calculations**

**Simulations on the He<sup>+</sup> ions injection**

**Figures S1-S12**

**Supplementary Video captions 1-6**

### **Details about numerical calculations**

We model and numerically solve our system as the Mott resistor network model as schematize in Fig. S7a. A load resistance  $R_{\text{load}}$  is making a voltage divisor circuit with a resistor tensor network. Each site of our grid of size  $L \times W$  is represented by 4 resistors of 3 possible values  $R_{cm}^{VO_2}$ ,  $R_{cm}^{V_5O_6}$ , and  $R_{MI}^{VO_2}$  ( $cm$  is short form of correlated metal, while  $MI$  is Mott Insulator). The system is initially fully insulator, *i.e.* all resistors are equal to  $R_{MI}^{VO_2}$ . For a finite amount of time  $t_{\text{pulse}}$  a constant voltage  $V$  is applied in order to obtain a voltage of the system:

$$V_s = \frac{R_s}{R_s + R_{\text{load}}} \quad (1)$$

where  $R_s$  denoted the total resistance of the resistors network. After the pulse the system relax and then can be applied or not another pulse. At each cycle of our simulations the entire network of resistors is updated following the probabilities:

The probability to switch from a metallic to an insulating state of VO<sub>2</sub>:

$$P_{CM_{VO_2} \rightarrow MI_{VO_2}} = e^{\frac{-(E_B^{VO_2} - E_{cm}^{VO_2})}{KT}} \quad (2)$$

The probability to switch from an insulating to a metallic state of VO<sub>2</sub>:

$$P_{MI_{VO_2} \rightarrow CM_{VO_2}} = e^{\frac{-(E_B^{VO_2} - E_{MI}^{VO_2})}{KT}} \quad (3)$$

The probability to switch from an insulating state of VO<sub>2</sub> to a metallic state of V<sub>5</sub>O<sub>9</sub>:

$$P_{MI_{VO_2} \rightarrow CM_{V_5O_9}} = e^{\frac{-(E_B^{V_5O_9} - E_{MI}^{VO_2} - \Delta V)}{KT}} \quad (4)$$

The probability to switch from a metallic state of V<sub>5</sub>O<sub>9</sub> to either state of VO<sub>2</sub>:

$$P_{CM_{V_5O_9} \rightarrow VO_2} = e^{\frac{-(E_B^{V_5O_9} - E_{cm}^{V_5O_9})}{KT}} \quad (5)$$

Then the probability to be in a metallic state of VO<sub>2</sub> is:  $\frac{e^{\frac{-E_{cm}^{VO_2}}{KT}}}{e^{\frac{-E_{cm}^{VO_2}}{KT}} + e^{\frac{-E_{MI}^{VO_2}}{KT}}}$ .

$E_{MI}^{VO_2}$ ,  $E_{cm}^{VO_2}$  and  $E_B^{VO_2}$ , *i.e.* the energy of the insulating and metallic state of VO<sub>2</sub> and the energy barrier between these 2 states, are computed in the same way of (1) as sketched in Fig. S7c and reported in Fig. S7d, and far away from the first order transition of VO<sub>2</sub> are kept constant, as done in (2). Instead,  $E_{cm}^{V_5O_9}$  and  $E_B^{V_5O_9}$  are respectively the energy of the metallic state of V<sub>5</sub>O<sub>9</sub> and the energy barrier toward a state of VO<sub>2</sub>. As shown in Fig. S7d, the values of these parameters are renormalized in respect of  $E_{MI}^{VO_2}$  in order to maintain a constant difference  $E_B^{V_5O_9} - E_{MI}^{VO_2}$  and  $E_B^{V_5O_9} - E_{cm}^{V_5O_9}$  due to the physical interpretation of this transition. Indeed, the chemical barrier needed by the oxygens to leave the molecules is evaluated as constant in temperature. K is the Boltzmann constant,  $\Delta V$  is the local voltage drop of the site and T is the local temperature on the site. As done in (1), the temperature is updated at each

cycle by the following formula:

$$T_{ij} = T_{subs} + \frac{V^2}{C_v R_{ij}} + 4T_{ij} - k_h \sum_{\langle ik \rangle}^{firstneighbor} T_{ik} \quad (6)$$

Where the indices  $i$  and  $j$  denotes the coordinates of the site in the network,  $C_v$  the specific heat of the system,  $k_h$  the thermal conductivity and  $\sum_{\langle ik \rangle}^{firstneighbor}$  denotes the summation over the first neighboring sites around the one with coordinates  $ij$ .

### **Simulations on the He<sup>+</sup> ions injection.**

V<sub>5</sub>O<sub>9</sub> can be thought of as an O-deficient VO<sub>2</sub> as has been shown in the main text. This realization leads us to the speculative possibility that we could prepare the VO<sub>2</sub> spatially to induce the current or E-field motivated transition directly. For practical reasons it would be of great advantage to locate where the filaments would be likely to form and the density of filaments to be written. Furthermore, it is possible that a spatially prepared VO<sub>2</sub> with O deficiencies would present a lower threshold for the onset of V<sub>5</sub>O<sub>9</sub> metallic state resulting in a designed pattern of filaments and lower power consumption. With this in mind, we have simulated such a structure applying a finely focused He<sup>+</sup> ion beam. We have access to such a beam with radius ~1 nm which has been used to write disorder in the high Tc superconductor YBa<sub>2</sub>Cu<sub>3</sub>O<sub>7</sub> (3). In Fig. S12a we show the calculated ion tracks for a 35 keV He<sup>+</sup> ion incident on a film of VO<sub>2</sub> using the program SRIM. In this figure we show the ion tracks for 5000 ions incident normal to a VO<sub>2</sub> film of 1500 Å thickness (the thickness of the samples studied in the main text). With a finely focused incident beam, the ion scattering causes the beam to broaden to ~200-

250 Å fwhm. Even more interesting is a plot of the resultant displacement shown in Fig. S12b. The beam results in a narrow track of displacements throughout the film. It is this result which tempts us to expect that this technology will afford us substantial control over the creation of conducting filaments in the  $\text{VO}_2$ .

### Figures and Captions

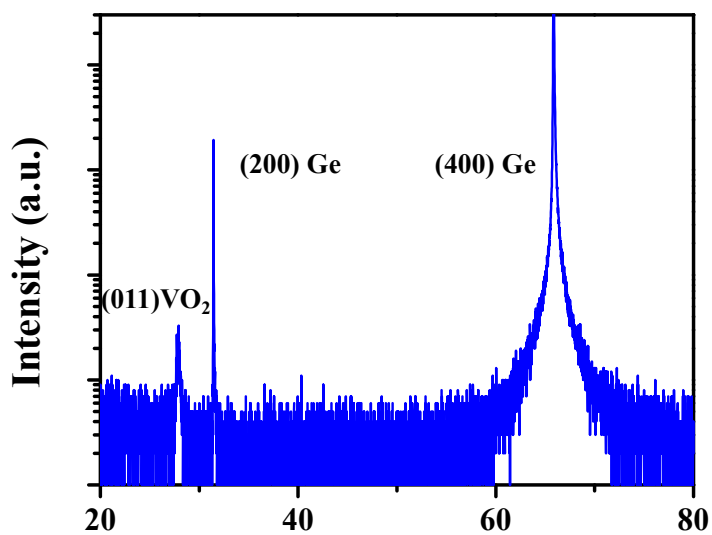

**Fig. S1. Room-temperature XRD scans for vanadium oxide films on (100) Ge substrate.**

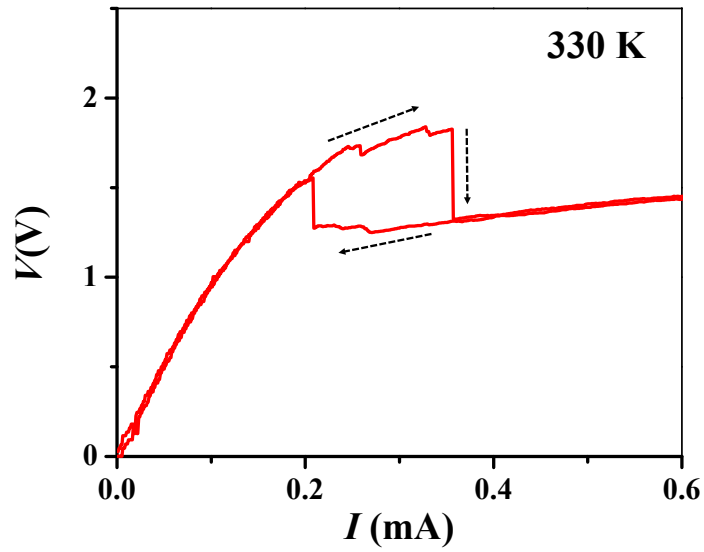

**Fig. S2.** Typical volatile resistive switching in VO<sub>2</sub>. I-V curve measured at 330K for one of the Au/VO<sub>2</sub>/Ge devices.

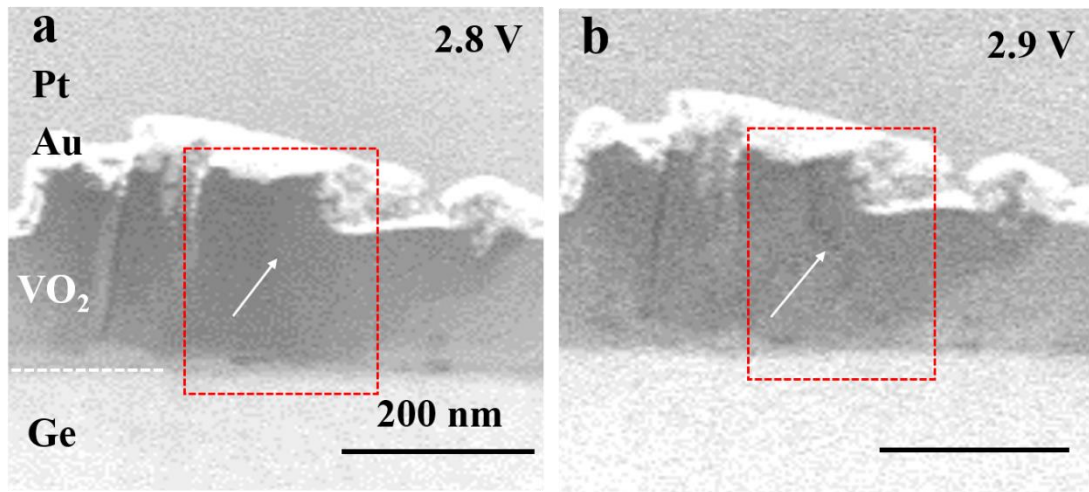

**Fig. S3.** (a) Before and (b) after the formation of the conductive filament. The position of the conductive filament is indicated by the white arrow.

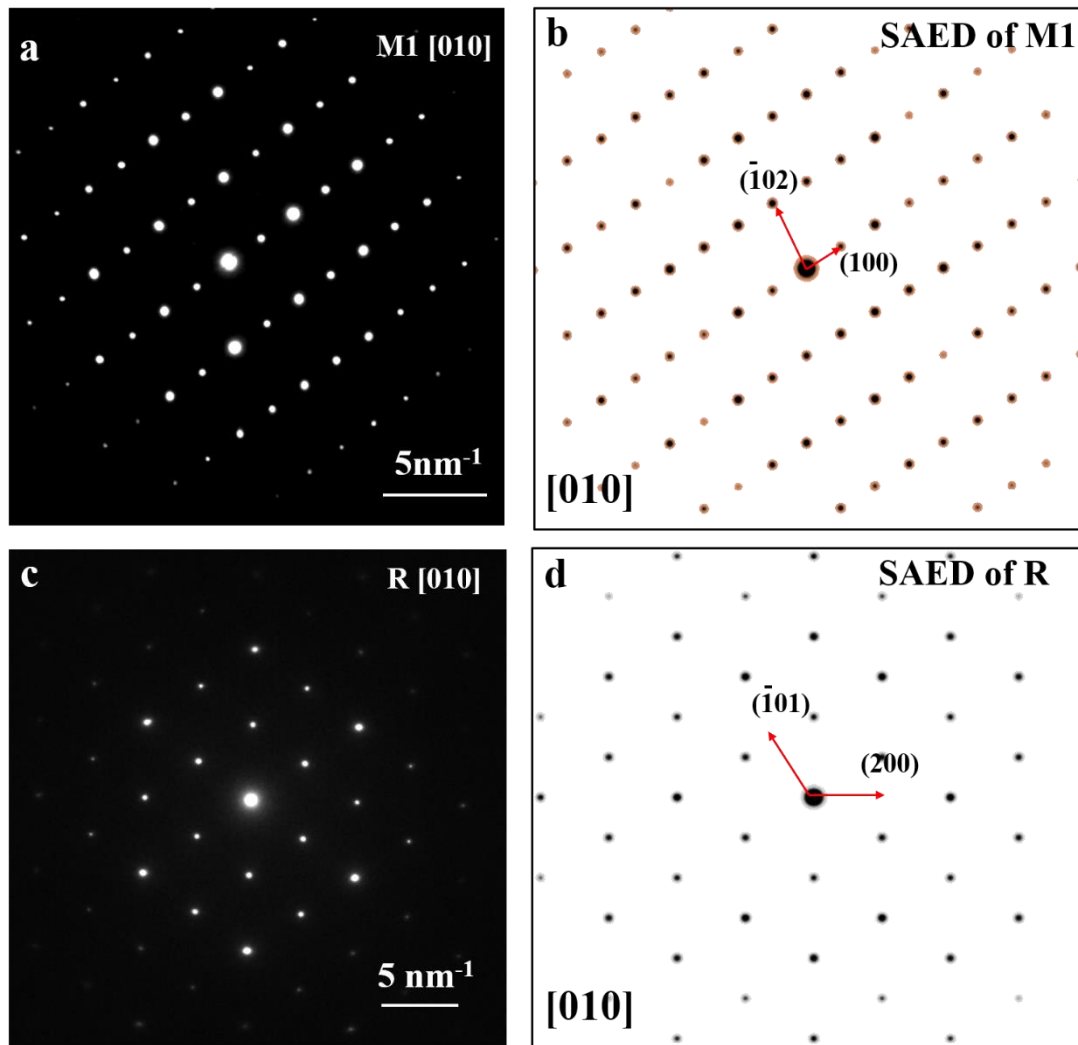

**Fig. S4.** The selected area electron diffraction analyses for VO<sub>2</sub>. (a) The SAED pattern for M1 phase VO<sub>2</sub> at [010] zone axis. (b) Simulated M1 phase VO<sub>2</sub> from [010] direction. (c) The SAED for high temperature rutile phase VO<sub>2</sub> from [010] zone axis. (d) Simulated SAED for R phase VO<sub>2</sub> from the same zone axis.

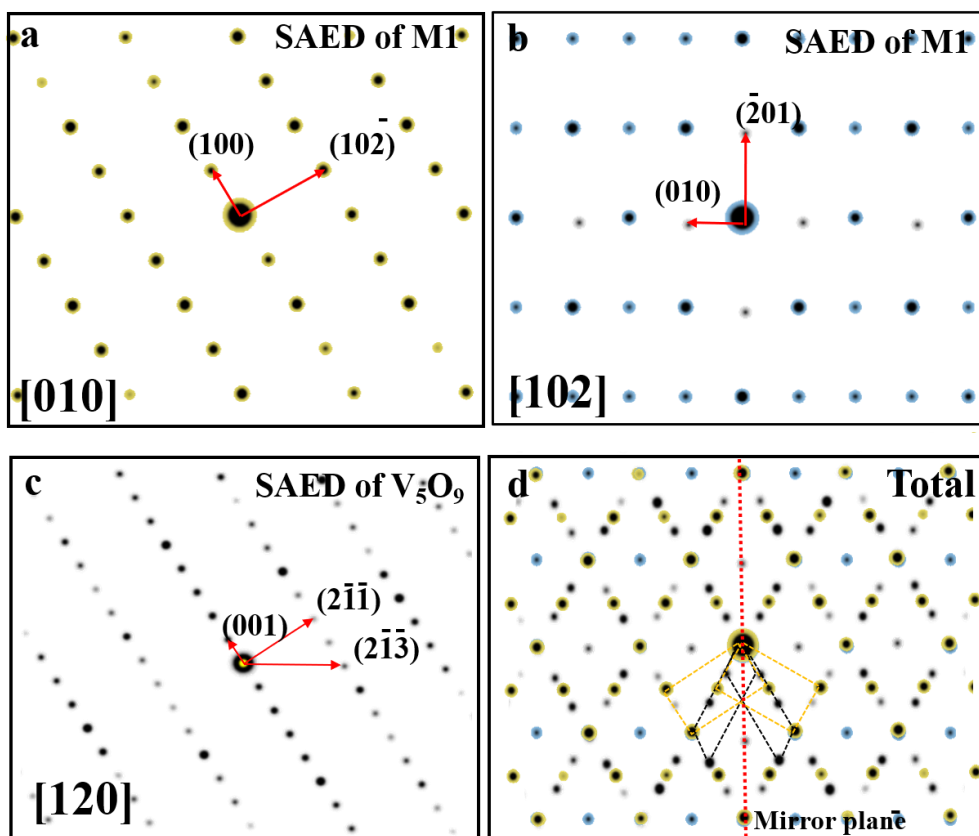

**Fig. S5. Simulated electron diffraction patterns.** (a), (b), (c), Simulated electron diffraction patterns for M1 VO<sub>2</sub> from [010] and [102], and V<sub>5</sub>O<sub>9</sub> from [120], respectively. (d) The combination of M1 VO<sub>2</sub> [102] diffraction, two sets of twinned V<sub>5</sub>O<sub>9</sub> from [102] and M1 VO<sub>2</sub> from [010], which matches well with the experimental results shown in the main text. The mirror plane of twins is shown in red. The yellow parallelograms mark the base vectors for M1 VO<sub>2</sub> in reciprocal space, while the black parallelograms show those of V<sub>5</sub>O<sub>9</sub>.

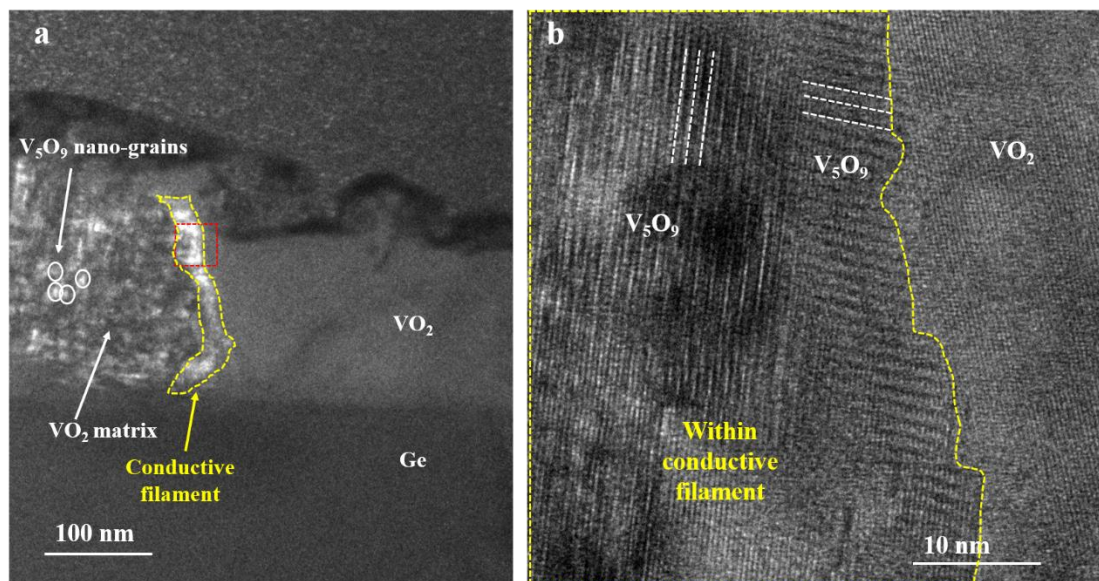

**Fig. S6 TEM studies on the conductive filament area.** (a) Dark field TEM images showing the  $V_5O_9$  conductive filament (in yellow). Some  $V_5O_9$  nano-grains within  $VO_2$  matrix have been encircled. (b) High resolution TEM image acquired from the red rectangle area in (a), showing the twin structure of  $V_5O_9$  phase.

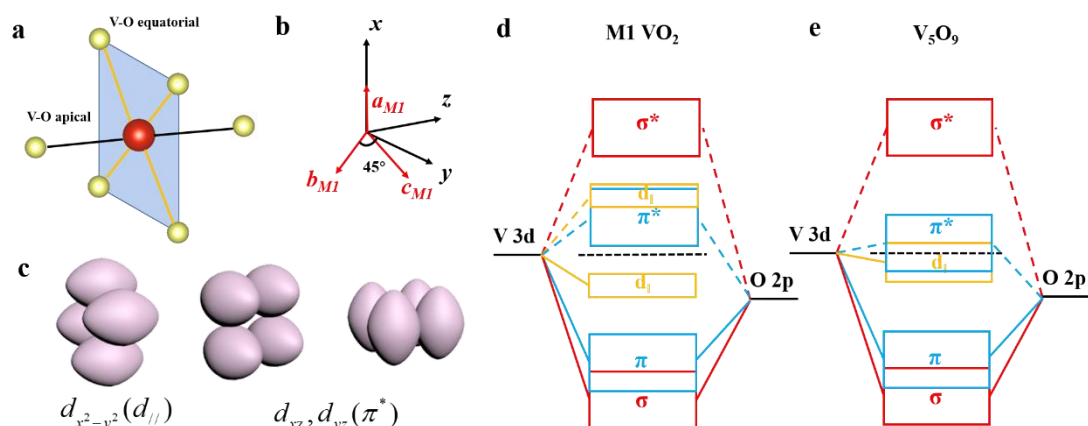

**Fig. S7. Orbital hybridization analyses for two relevant vanadates.** (a) Schematic diagram showing the  $VO_6$  octahedron. The apical and equatorial V-O bonds are indicated in black and orange colors. (b) The relationship between the geometric axis (red arrows) and the coordination axis of M1 phase  $VO_2$ . (c) The illustration of



vanadium  $t_{2g}$  d orbitals. **(d)**, **(e)** Schematic of the orbital band structure of M1 phase  $\text{VO}_2$  and  $\text{V}_5\text{O}_9$  phase, deduced from the measured EELS result.

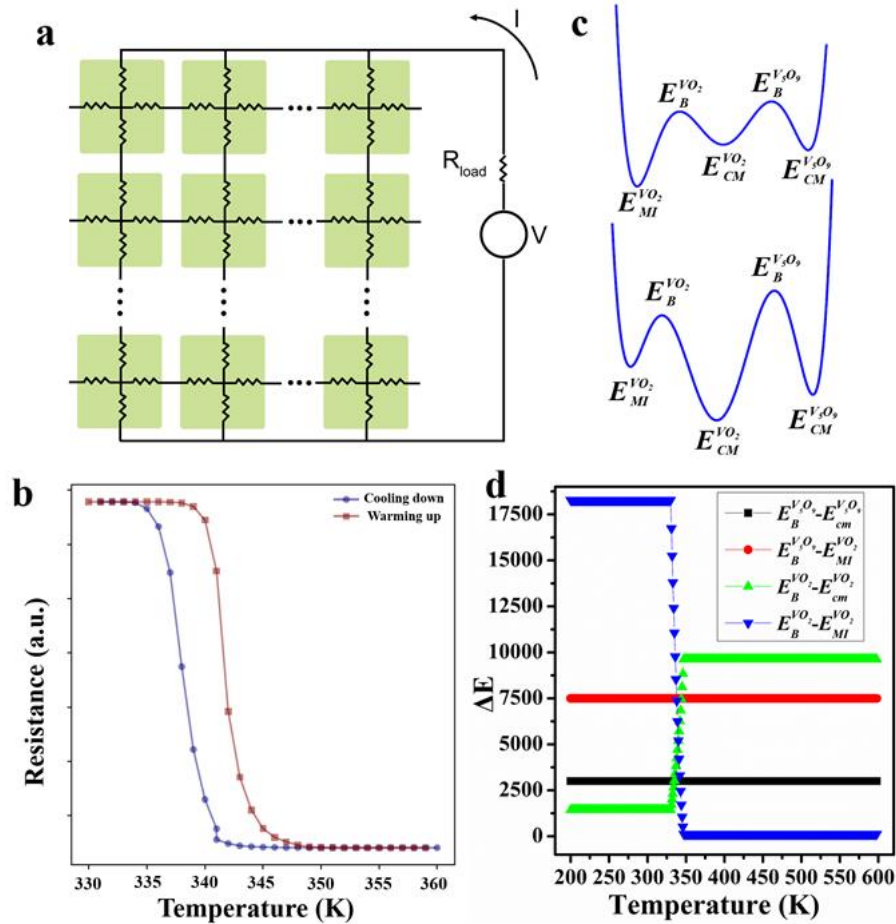

**Fig. S8. Sketch representation of the Mott resistor network model.** **(a)** The simulation circuits. Each site of a grid of size  $L \times W$  is represented by 4 resistors. All resistors in each site have the same one of 3 possible values correspond to the 3 phases: metal  $\text{VO}_2$ , metal  $\text{V}_5\text{O}_9$  and insulator  $\text{VO}_2$ , respectively. **(b)** Simulated R-T curve for  $\text{VO}_2$  volatile switching. The transition temperature is about 340 K. **(c)** Cartoon schematic of the free energy of the system near  $T_{\text{IMT}}$  ( $T < T_{\text{IMT}}$  on the top and  $T > T_{\text{IMT}}$  at the bottom). **(d)** Energies vs Temperature computed as discussed in the Supporting

Information.

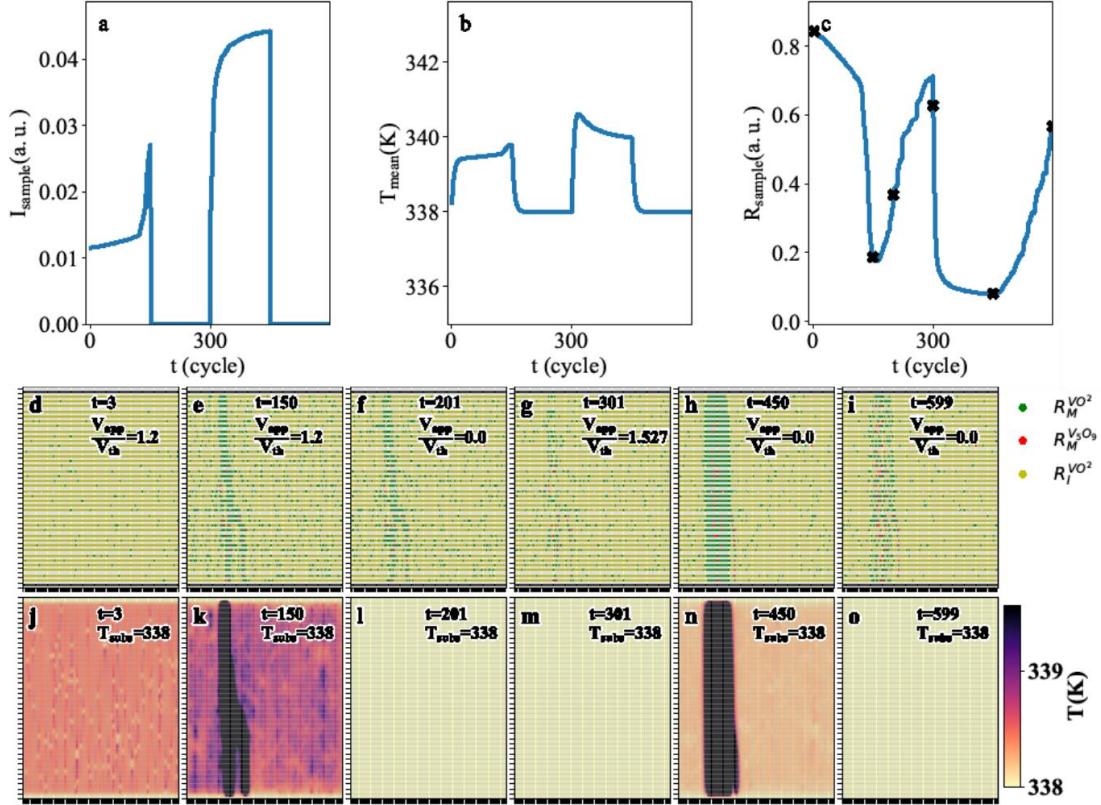

**Fig. S9. Simulations of the formation and relaxation of volatile conductive filament at 338 K (close to IMT temperature).** (a) Electric current of the system in arbitrary unit as a function of time. A first pulse voltage of  $V_{\text{app}}/V_{\text{th}}=1.2$  is applied from  $t=1$  until  $t=150$  and a second pulse of  $V_{\text{app}}/V_{\text{th}}=1.527$  is applied from  $t=300$  until  $t=450$ . The substrate temperature is fixed at  $T=338$  K.  $V_{\text{th}}$  is the voltage that triggers threshold switching. (b) Average temperature through the network as a function of time. The small variation in the sample temperature at 338 K is due to the Joule heating caused by applied voltage. (c) Resistance of the resistor network in arbitrary unit as a function of time. (d)-(i) Distributions of metallic rutile  $\text{VO}_2$  (green),  $\text{V}_5\text{O}_9$  phase (red) and insulator M1  $\text{VO}_2$  (yellow) at different time: (d)  $t=3$  (starting of the first pulse of voltage

$V_{\text{app}}/V_{\text{th}}=1.2$ ); **(e)**  $t=150$  (formation of volatile conductive filament. The conductive filament is formed of rutile  $\text{VO}_2$ ); **(f)**  $t=201$  (during the relaxation process); **(g)**  $t=301$  (starting of the first pulse of voltage  $V_{\text{app}}/V_{\text{th}}=1.527$ ); **(h)**  $t=450$  (first snapshot after the second pulse); **(i)**  $t=599$  (during the relaxation process). A stronger second pulse was applied on the sample and the conductive filament is largely formed by rutile  $\text{VO}_2$  (Joule heating). Notably very small patches of  $\text{V}_5\text{O}_9$  can be found. The  $t$  is the simulation step. **(j)-(o)** The corresponding temperature distributions in the unit of Kelvin. The full simulated movie can be found in the Supplementary Video 4.

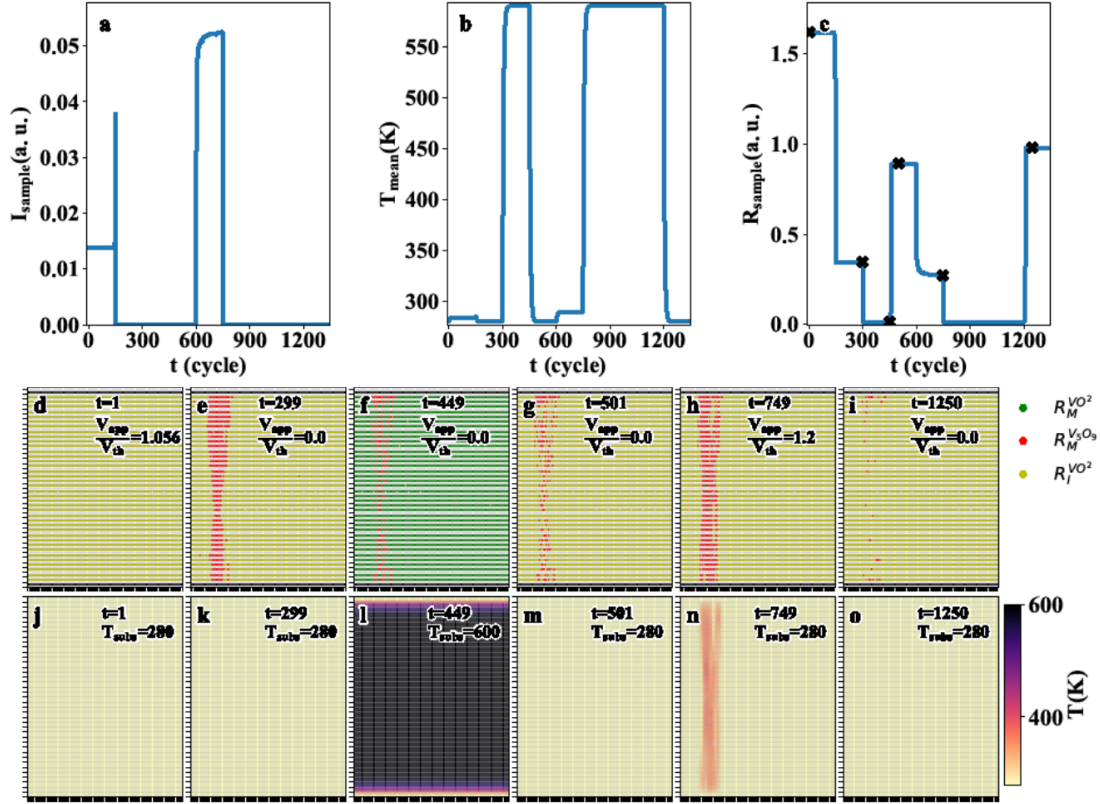

**Fig. S10. Simulation results for non-volatile conductive filament at 280 K (far from IMT temperature).** **a**, Current across the resistor network in arbitrary unit as a function of time. A first  $V_{app}/V_{th}=1.056$  pulse is applied from  $t=1$  to  $t=150$  and a second one of  $V_{app}/V_{th}=1.2$  from  $t=600$  to  $t=750$ . **b**, Average temperature through the network as a function of time. The small variation in the sample temperature at 280 K is due to the applied voltage that induces Joule heating. The substrate is heated to 600 K for annealing at  $300 < t < 450$  and  $750 < t < 1200$ . **c**, Resistance of the network in arbitrary unit as a function of time. **d-i**, Distribution of metallic rutile  $VO_2$  (green),  $V_5O_9$  phase (red) and insulator  $M1 VO_2$  (yellow) at different time as indicated in **c** with star marks. **d**,  $t=1$  (starting position); **e**,  $t=299$  (after the relaxation of the first applied voltage  $V_{app}/V_{th}=1.056$ ); **f**,  $t=449$  (just before the finishing of the first annealing process); **g**,  $t=501$  (after the relaxation of the first annealing process); **h**,  $t=749$  (during the second

pulse of voltage  $V_{app}/V_{th}=1.2$ ); **i**,  $t=1250$  (during the relaxation of the last annealing process). Note, the  $t$  is the simulation step. **j-o**, The corresponding temperature distributions in the unit of Kelvin. The full simulated movie can be found in the Supplementary Video 5.

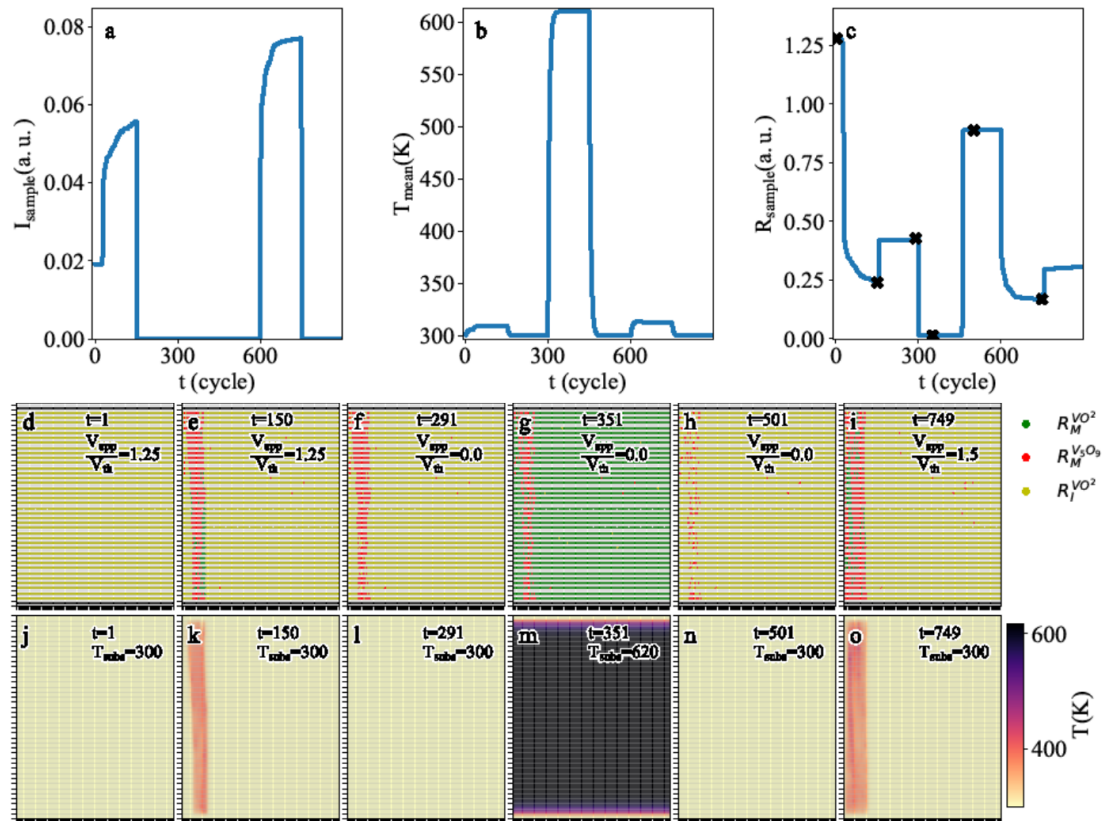

**Fig. S11. Simulation for volatile and non-volatile conductive filament at room temperature.** **a**, Current across network in arbitrary unit as a function of time. A first voltage  $V_{app}/V_{th}=1.25$  pulse is applied from  $t=1$  until  $t=150$  and a second  $V_{app}/V_{th}=1.5$  is applied from  $t=600$  until  $t=750$ . **b**, Average temperature through the network as a function of time. The small variation in the temperature of the sample at 300 K is due to the applied voltage that induce Joule heating. The substrate temperature is increased up to 620 K for annealing purpose at  $300 < t < 450$ . **c**, Resistance of the network in

arbitrary unit as a function of time. **d-i**, Distribution of metallic rutile VO<sub>2</sub> (green), V<sub>5</sub>O<sub>9</sub> phase (red) and insulator M1 VO<sub>2</sub> (yellow) at different times. **d**, t=1 (starting position); **e**, t=150 (during first pulse voltage of  $V_{app}/V_{th}=1.25$  is applied); **f**, t=291 (after relaxation of the first pulse); **g**, t=351 (during the annealing process); **h**, t=501 (after the annealing process); **i**, t=749 (the second pulse with smaller stimuli). Notably, once the non-volatile V<sub>5</sub>O<sub>9</sub> filament is formed the surrounding areas of the conductive filament might heated up by the stronger pulse, thus driving the VO<sub>2</sub> insulating phase into a metallic VO<sub>2</sub> via IMT. **j-o**, The corresponding temperature distributions in degrees Kelvin. The full simulated movie can be found in the Supplementary Video 6.

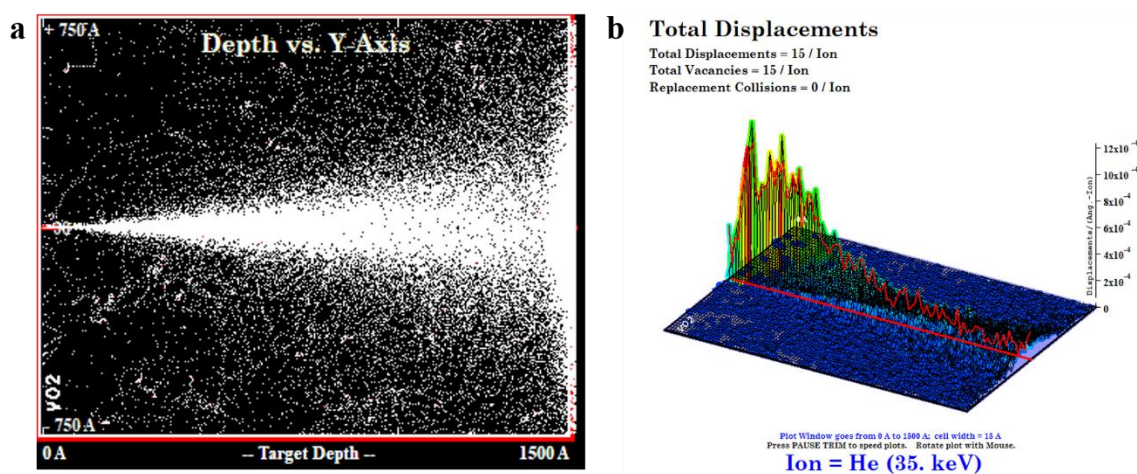

**Fig. S12. Simulations on the He<sup>+</sup> ions injection into VO<sub>2</sub> film.** **a**, Ion beam track for 35 keV He<sup>+</sup> ions incident on a film of 1500 Å of VO<sub>2</sub>. Beam is incident from the left. **b**, Displacements in the VO<sub>2</sub> film as a function of depth. The track of displacements is narrow through the film.

**Supplementary Video 1 | *In-situ* TEM observation of the V<sub>5</sub>O<sub>9</sub> conductive filament.**

**Supplementary Video 2 |  $V_5O_9$  conductive filament reappear at the same location after the annealing.**

**Supplementary Video 3 | The whole time dependent numerical simulations for Fig. 5.**

**Supplementary Video 4 | The whole time dependent numerical simulations for Supplementary Materials Fig. 9.**

**Supplementary Video 5 | The whole time dependent numerical simulations for Supplementary Materials Fig. 10.**

**Supplementary Video 6 | The whole time dependent numerical simulations for Supplementary Materials Fig. 11.**

1. J. D. Valle, P. Salev, F. Tesler, N. M. Vargas, Y. Kalcheim, P. Wang, J. Trastoy, M.-H. Lee, G. Kassabian, J. G. Ramírez, M. J. Rozenberg, I. K. Schuller, Subthreshold firing in mott nanodevices. *Nature*, **569**, 388–392 (2019).
2. P. Stoliar, J. Tranchant, B. Corraze, E. Janod, M. -P. Besland, F. Tesler, M. Rozenberg, L. Cario. A leaky-integrate-and-fire neuron analog realized with a mott insulator. *Adv. Funct. Mater.*, **27**, 1604740 (2017).
3. S. A. Cybart, E. Y. Cho, T. J. Wong, B. H. Wehlin, M. K. Ma, C. Huynh, R. C. Dynes, Nano Josephson superconducting tunnel junctions in  $YBa_2Cu_3O_{7-\delta}$  directly patterned with a focused helium ion beam. *Nat. Nano.* **10**, 598-602 (2015)
